# Supplementary material for: Insect oral secretions suppress wound-induced responses in Arabidopsis
Source: PubMed Central journal article supplement — J Exp Bot. 2011 Oct 11;63(2):727–37. doi: 10.1093/jxb/err308 (PMC3254683; doi:10.1093/jxb/err308), 2011-10-11
Supplement: supp_err308_00065664_file001.pdf [file supp_err308_00065664_file001.pdf]

Insect oral secretions suppress wound-induced responses in *Arabidopsis*.

Floriane Consales, Fabian Schweizer, Matthias Erb, Caroline Gouhier-Darimont, Natacha Bodenhausen, Friederike Bruessow, Islam Sobhy and Philippe Reymond

### Supplementary data

**Figure S1.** HPLC chromatogram of insect OS. OS of *P. brassicae* and *S. littoralis* was analyzed on a reverse-phase C18 column. Standards of known FACs and fatty acids were used to identify putative compounds eluting at the same retention times.

**Figure S2.** OS suppression of wound-responsive genes does not require an enzymatic activity. (A) Glucose oxidase (GOX) activity from insect OS, visualized by a brown precipitate on glass fiber discs, was detected in *S. littoralis* OS (*S. l.*) and in the positive control GOX, but not in *P. brassicae* OS (*P. b.*). (B) Expression of ERF/AP2 TF was monitored by qPCR after wounding (black bar), after treatment with intact, filtered through a 3kDa filter or boiled *P. brassicae* OS (light grey bars), and after treatment with purified GOX (hatched bar) for 10 h. Untreated plants were used as controls. Values are normalized to the reference gene and are the mean of three technical replicates.

**Figure S3.** *P. brassicae* and *S. littoralis* OS reduce wound-induced water loss. Leaves were wounded (black bars), treated with *P. brassicae* OS (light grey bars), or treated with *S. littoralis* OS (dark grey bars). Untreated plants were used as controls (white bars). Fresh weight of detached leaves was measured after 4 h. Values ( $\pm$ SE) are the mean of 30 leaves. Bars with different letters differ at  $P$ -value  $<0.05$  (Tukey's HSD test).

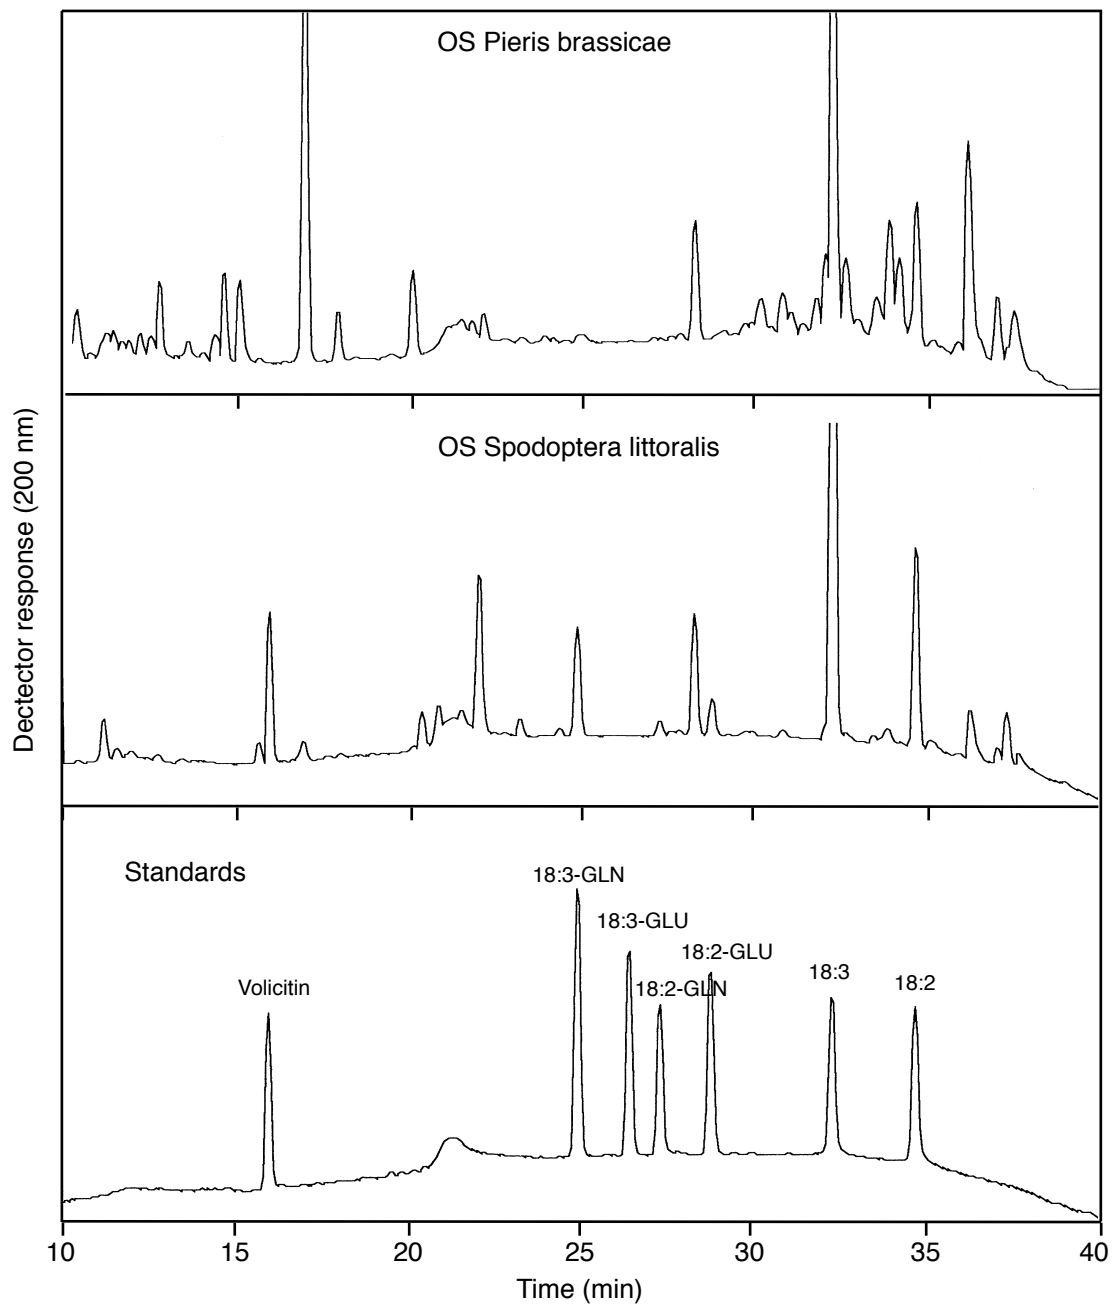

Figure S1

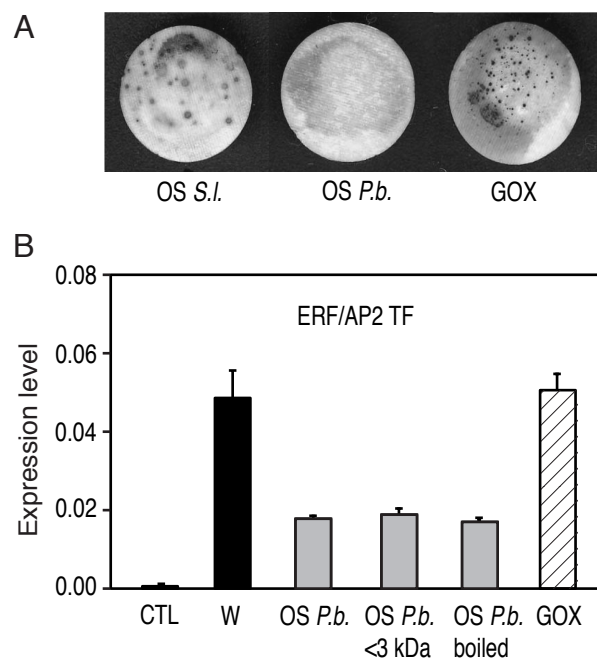

Figure S2

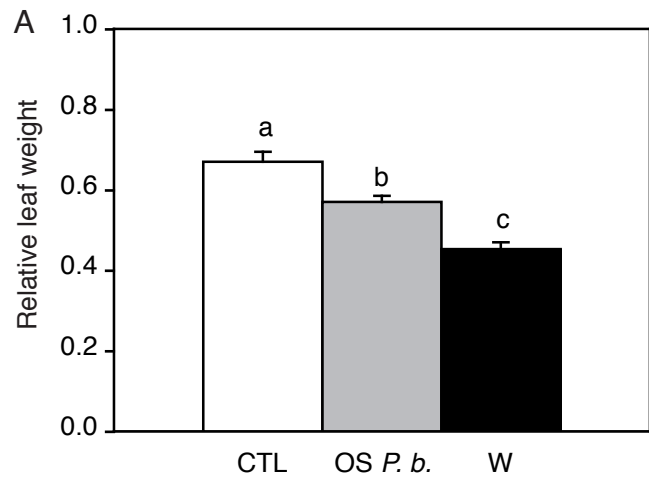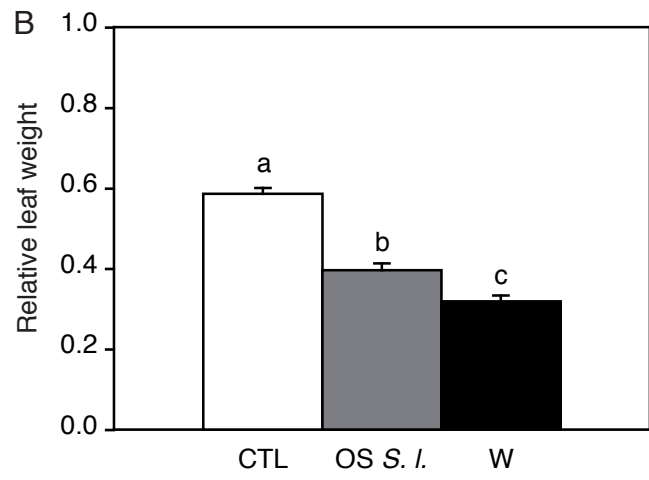

Figure S3

**Table S1.** List of genes induced by wounding after 6h or 24 h. Leaves were punctured with four 1 mm-holes (wounding). 1 microL of *S. littoralis* OS was applied to the holes (wounding + OS). Untreated plants were used as controls. RNA samples were hybridized to whole-genome Arabidopsis microarrays. Genes significantly induced by wounding after either 6h or 24h are presented (ratio >1.5, *P*-value <0.05).

| AGI       | Description                                                                         | Treatment 6 h                   |                 |                                      |                 | Treatment 24 h              |                                 |                 |                                      |                             |         |
|-----------|-------------------------------------------------------------------------------------|---------------------------------|-----------------|--------------------------------------|-----------------|-----------------------------|---------------------------------|-----------------|--------------------------------------|-----------------------------|---------|
|           |                                                                                     | Expression ratio Wounding (n=6) | <i>P</i> -value | Expression ratio Wounding + OS (n=3) | <i>P</i> -value | <i>P</i> -value W vs W + OS | Expression ratio Wounding (n=6) | <i>P</i> -value | Expression ratio Wounding + OS (n=3) | <i>P</i> -value W vs W + OS |         |
| At2g38240 | oxidoreductase, 2OG-Fe(II) oxygenase family protein                                 | 16.33                           | 0.00002         | 26.78                                | 0.00031         | 0.09725                     | 1.24                            | 0.21242         | 2.50                                 | 0.05497                     | 0.01752 |
| At5g07010 | sulfoltransferase                                                                   | 7.36                            | 0.00000         | 13.06                                | 0.00003         | 0.17827                     | 1.07                            | 0.62492         | 2.92                                 | 0.04338                     | 0.03967 |
| At2g39030 | GCN5-related N-acetyltransferase (GNAT) family protein                              | 6.36                            | 0.00012         | 17.08                                | 0.00003         | 0.03024                     | 3.88                            | 0.00016         | 9.67                                 | 0.00015                     | 0.02165 |
| At2g02990 | ribonuclease 1 (RNS1)                                                               | 5.46                            | 0.00000         | 11.20                                | 0.00183         | 0.31312                     | 1.00                            | 0.48455         | 1.00                                 | 0.63517                     | 1.00000 |
| At5g24780 | vegetative storage protein Vsp1                                                     | 5.28                            | 0.00302         | 8.22                                 | 0.00278         | 0.28631                     | 2.19                            | 0.33913         | 3.95                                 | 0.10179                     | 0.32522 |
| At5g59320 | transfer protein 3 (LTP 3) identical to lipid transfer protein 3 from Arabidopsis t | 5.24                            | 0.00529         | 3.31                                 | 0.01198         | 0.62182                     | 4.11                            | 0.06336         | 2.23                                 | 0.16298                     | 0.65334 |
| At4g34230 | cinnamyl-alcohol dehydrogenase, putative                                            | 5.10                            | 0.00002         | 7.69                                 | 0.00000         | 0.10475                     | 2.49                            | 0.00230         | 2.42                                 | 0.00533                     | 0.99098 |
| At5g59310 | transfer protein 4 (LTP 4) identical to lipid transfer protein 4 from Arabidopsis t | 5.08                            | 0.00469         | 3.35                                 | 0.00987         | 0.65911                     | 17.86                           | 0.05612         | 6.28                                 | 0.03053                     | 0.92180 |
| At5g05600 | oxidoreductase, 2OG-Fe(II) oxygenase family protein                                 | 5.02                            | 0.00006         | 8.39                                 | 0.00034         | 0.12137                     | 2.70                            | 0.00024         | 6.03                                 | 0.00061                     | 0.00252 |
| At3g22600 | protease inhibitor/seed storage/lipid transfer protein (LTP) family contains Pfar   | 5.01                            | 0.00854         | 2.43                                 | 0.66749         | 0.16997                     | 2.97                            | 0.15183         | 2.11                                 | 0.96906                     | 0.44558 |
| At4g11320 | putative drought-inducible cysteine proteinase (AT4g11320) mRNA, complete c         | 4.36                            | 0.00050         | 5.35                                 | 0.04256         | 0.91974                     | 1.09                            | 0.98573         | 1.70                                 | 0.14009                     | 0.06352 |
| At2g37180 | plasma membrane intrinsic protein 2C (PIP2C) / aquaporin PIP2.3 (PIP2.3) / w        | 4.24                            | 0.00001         | 11.88                                | 0.00000         | 0.00831                     | 1.57                            | 0.01798         | 2.01                                 | 0.02333                     | 0.52720 |
| At1g78530 | receptor protein kinase, putative                                                   | 4.21                            | 0.40816         | 3.36                                 | 0.17571         | 0.95581                     | 1.86                            | 0.00267         | 1.82                                 | 0.00991                     | 0.97003 |
| At3g46220 | expressed protein                                                                   | 3.76                            | 0.06170         | 4.54                                 | 0.00426         | 0.41930                     | 1.59                            | 0.01193         | 2.14                                 | 0.51691                     | 0.26184 |
| At3g55970 | oxidoreductase, 2OG-Fe(II) oxygenase family protein                                 | 3.74                            | 0.00001         | 7.54                                 | 0.00037         | 0.01939                     | 1.44                            | 0.16312         | 4.86                                 | 0.00038                     | 0.00069 |
| At4g15210 | beta-amylase (BMY1) / 1,4-alpha-D-glucan maltohydrolase                             | 3.59                            | 0.00006         | 5.96                                 | 0.00017         | 0.05686                     | 1.38                            | 0.04762         | 1.44                                 | 0.16071                     | 0.93796 |
| At4g08870 | arginase, putative                                                                  | 3.56                            | 0.00263         | 6.83                                 | 0.00013         | 0.12446                     | 1.31                            | 0.06272         | 1.56                                 | 0.11114                     | 0.70015 |
| At3g48520 | cytochrome P450 family protein                                                      | 3.46                            | 0.00015         | 12.01                                | 0.00070         | 0.01379                     | 1.02                            | 0.30302         | 1.00                                 | 0.51591                     | 0.51649 |
| At2g38870 | protease inhibitor, putative                                                        | 3.41                            | 0.00000         | 2.82                                 | 0.00032         | 0.04824                     | 2.64                            | 0.00024         | 3.40                                 | 0.00014                     | 0.21619 |
| At5g61890 | AP2 domain-containing transcription factor family protein                           | 3.32                            | 0.00031         | 1.41                                 | 0.11963         | 0.03464                     | 1.44                            | 0.04194         | 1.00                                 | 0.65014                     | 0.08369 |
| At5g07280 | receptor-like protein kinase-like protein                                           | 3.21                            | 0.49656         | 2.54                                 | 0.09395         | 0.67348                     | 2.01                            | 0.01322         | 1.85                                 | 0.01984                     | 0.81264 |
| At3g16400 | jacalin lectin family protein                                                       | 3.17                            | 0.00054         | 5.84                                 | 0.00014         | 0.04648                     | 1.41                            | 0.16098         | 1.37                                 | 0.13282                     | 0.86153 |
| At3g54420 | class IV chitinase (CHIV)                                                           | 3.13                            | 0.00049         | 2.08                                 | 0.00318         | 0.20320                     | 0.96                            | 0.26434         | 0.85                                 | 0.18458                     | 0.40160 |
| At4g17470 | palmitoyl protein thioesterase family protein                                       | 3.12                            | 0.00679         | 3.61                                 | 0.00752         | 0.62072                     | 0.96                            | 0.40408         | 1.24                                 | 0.58785                     | 0.92600 |
| At3g16470 | jacalin lectin family protein                                                       | 3.01                            | 0.00147         | 5.79                                 | 0.00028         | 0.04768                     | 1.34                            | 0.02009         | 1.64                                 | 0.05101                     | 0.30223 |
| At1g20070 | expressed protein                                                                   | 3.00                            | 0.00136         | 2.57                                 | 0.02275         | 0.53676                     | 2.40                            | 0.00303         | 3.03                                 | 0.01751                     | 0.37248 |
| At2g37130 | peroxidase 21 (PER21) (P21) (PRXR5)                                                 | 2.98                            | 0.00001         | 5.77                                 | 0.00019         | 0.02080                     | 2.25                            | 0.00003         | 6.22                                 | 0.00003                     | 0.00003 |
| At2g47810 | histone-like transcription factor (CBF/NF-Y) family protein                         | 2.95                            | 0.00237         | 2.29                                 | 0.03239         | 0.27680                     | 1.30                            | 0.34140         | 1.17                                 | 0.22593                     | 0.58013 |
| At1g73325 | trypsin and protease inhibitor family protein / Kunitz family protein               | 2.93                            | 0.01187         | 1.40                                 | 0.25518         | 0.23618                     | 1.79                            | 0.05287         | 1.75                                 | 0.27841                     | 0.77812 |
| At1g43160 | AP2 domain-containing protein RAP2.6 (RAP2.6)                                       | 2.90                            | 0.00545         | 4.92                                 | 0.00310         | 0.17984                     | 1.00                            | 0.45972         | 1.00                                 | 0.61562                     | 1.00000 |
| At2g43510 | trypsin inhibitor, putative                                                         | 2.81                            | 0.00000         | 8.57                                 | 0.00000         | 0.00005                     | 3.08                            | 0.00007         | 8.68                                 | 0.00000                     | 0.00600 |
| At4g08910 | expressed protein                                                                   | 2.76                            | 0.02308         | 2.75                                 | 0.00228         | 0.84079                     | 1.51                            | 0.14551         | 1.37                                 | 0.10792                     | 0.47930 |
| At2g32830 | inorganic phosphate transporter (PHT5)                                              | 2.72                            | 0.00339         | 3.52                                 | 0.00488         | 0.13142                     | 1.00                            | 0.00082         | 1.00                                 | 0.01457                     | 1.00000 |
| At4g24970 | ATP-binding region, ATPase-like domain-containing protein                           | 2.71                            | 0.01879         | 6.46                                 | 0.00458         | 0.01216                     | 0.99                            | 0.51854         | 1.00                                 | 0.67360                     | 0.73834 |
| At3g13790 | beta-fructosidase (BFRUCT1) / beta-fructofuranosidase / cell wall invertase         | 2.66                            | 0.00008         | 1.62                                 | 0.02797         | 0.07632                     | 1.21                            | 0.04821         | 1.00                                 | 0.68713                     | 0.10736 |
| At3g52520 | expressed protein                                                                   | 2.54                            | 0.00233         | 2.45                                 | 0.00934         | 0.82355                     | 1.54                            | 0.20568         | 1.57                                 | 0.43640                     | 0.96090 |
| At4g36950 | pseudogene, similar to OSJNBa0042L16.2                                              | 2.51                            | 0.04155         | 1.78                                 | 0.31794         | 0.28211                     | 1.16                            | 0.71208         | 1.21                                 | 0.88370                     | 0.82551 |
| At2g30570 | photosystem II reaction center W (PsbW) protein-related                             | 2.50                            | 0.00324         | 3.12                                 | 0.00088         | 0.19792                     | 1.84                            | 0.36536         | 1.68                                 | 0.38499                     | 0.81100 |
| At2g43620 | chitinase, putative                                                                 | 2.50                            | 0.00109         | 12.29                                | 0.00010         | 0.00252                     | 1.23                            | 0.97690         | 1.10                                 | 0.51825                     | 0.64564 |
| At2g33380 | calcium-binding RD20 protein (RD20)                                                 | 2.47                            | 0.00028         | 6.70                                 | 0.00002         | 0.00525                     | 1.44                            | 0.00075         | 1.50                                 | 0.01579                     | 0.95452 |
| At4g23600 | coronatine-responsive tyrosine aminotransferase / tyrosine transaminase             | 2.47                            | 0.02077         | 3.62                                 | 0.00086         | 0.24572                     | 1.94                            | 0.00026         | 1.89                                 | 0.00520                     | 0.87717 |
| At2g39310 | jacalin lectin family protein                                                       | 2.45                            | 0.00538         | 3.68                                 | 0.00640         | 0.11166                     | 1.63                            | 0.10933         | 2.37                                 | 0.02649                     | 0.07087 |
| At5g50200 | expressed protein                                                                   | 2.45                            | 0.00539         | 3.21                                 | 0.00504         | 0.24398                     | 1.39                            | 0.52168         | 1.36                                 | 0.57021                     | 0.98072 |
| At1g75550 | glycine-rich protein                                                                | 2.41                            | 0.00052         | 3.48                                 | 0.00133         | 0.08789                     | 1.14                            | 0.12037         | 1.07                                 | 0.08359                     | 0.71981 |
| At2g39330 | jacalin lectin family protein                                                       | 2.37                            | 0.00015         | 4.66                                 | 0.00000         | 0.03662                     | 1.52                            | 0.00001         | 2.23                                 | 0.00016                     | 0.07572 |
| At5g20230 | plastocyanin-like domain-containing protein                                         | 2.37                            | 0.01518         | 5.77                                 | 0.00151         | 0.03278                     | 1.52                            | 0.23809         | 2.85                                 | 0.10108                     | 0.27133 |
| At4g01080 | expressed protein                                                                   | 2.35                            | 0.01057         | 2.95                                 | 0.00106         | 0.35279                     | 1.14                            | 0.33428         | 0.72                                 | 0.40635                     | 0.10877 |
| At2g10920 | hypothetical protein                                                                | 2.35                            | 0.02996         | 3.01                                 | 0.00465         | 0.23703                     | 1.00                            | 0.00235         | 1.00                                 | 0.02803                     | 1.00000 |
| At3g58020 | DNAJ heat shock N-terminal domain-containing protein                                | 2.34                            | 0.00465         | 2.47                                 | 0.02037         | 0.70666                     | 1.08                            | 0.12636         | 1.06                                 | 0.21899                     | 0.83015 |
| At2g39520 | hypothetical protein                                                                | 2.32                            | 0.00222         | 2.57                                 | 0.00866         | 0.61448                     | 1.01                            | 0.33898         | 1.00                                 | 0.48929                     | 0.51649 |
| At3g16420 | jasmonate inducible protein; myrosinase binding protein-like (MDC8.5) mRNA,         | 2.30                            | 0.00034         | 2.74                                 | 0.00020         | 0.26770                     | 1.02                            | 0.96165         | 1.17                                 | 0.36789                     | 0.02955 |
| At4g01985 | expressed protein                                                                   | 2.30                            | 0.02441         | 2.65                                 | 0.00311         | 0.52635                     | 1.81                            | 0.16987         | 1.65                                 | 0.28311                     | 0.81795 |
| At3g13790 | beta-fructosidase (BFRUCT1) / beta-fructofuranosidase / cell wall invertase         | 2.30                            | 0.04713         | 2.13                                 | 0.05782         | 0.91073                     | 1.12                            | 0.18741         | 1.00                                 | 0.10575                     | 0.32883 |
| At2g30360 | CBL-interacting protein kinase 11 (CIPK11)                                          | 2.29                            | 0.00065         | 3.78                                 | 0.00066         | 0.00191                     | 1.62                            | 0.02986         | 1.46                                 | 0.14895                     | 0.56195 |
| At1g79780 | integral membrane protein, putative                                                 | 2.29                            | 0.00362         | 2.55                                 | 0.00775         | 0.61396                     | 1.18                            | 0.11489         | 1.19                                 | 0.21522                     | 0.96207 |
| At2g33240 | putative myosin heavy chain                                                         | 2.29                            | 0.00388         | 3.49                                 | 0.00727         | 0.12870                     | 1.49                            | 0.78319         | 1.49                                 | 0.78396                     | 0.96086 |
| At1g77885 | expressed protein                                                                   | 2.27                            | 0.01179         | 2.74                                 | 0.00201         | 0.35493                     | 1.26                            | 0.10552         | 1.26                                 | 0.23605                     | 0.99830 |

|           |                                                                                       |      |         |       |         |         |      |         |      |         |         |
|-----------|---------------------------------------------------------------------------------------|------|---------|-------|---------|---------|------|---------|------|---------|---------|
| At1g37130 | nitrate reductase 2 (NR2)                                                             | 2.27 | 0.00424 | 3.19  | 0.00329 | 0.36165 | 0.98 | 0.38600 | 0.92 | 0.27571 | 0.67587 |
| At4g18620 | hypothetical protein                                                                  | 2.26 | 0.02009 | 3.69  | 0.00149 | 0.03465 | 1.08 | 0.00327 | 1.00 | 0.00443 | 0.51649 |
| At5g64120 | peroxidase, putative                                                                  | 2.23 | 0.00002 | 8.00  | 0.00104 | 0.01969 | 1.73 | 0.00064 | 1.34 | 0.07279 | 0.16126 |
| At2g37040 | phenylalanine ammonia-lyase 1 (PAL1)                                                  | 2.23 | 0.00097 | 2.33  | 0.01284 | 0.85567 | 1.33 | 0.68264 | 1.05 | 0.96635 | 0.77450 |
| At1g02205 | CER1 protein                                                                          | 2.23 | 0.00201 | 1.58  | 0.02405 | 0.25866 | 1.63 | 0.12601 | 1.59 | 0.12292 | 0.94609 |
| At1g56650 | myb family transcription factor (MYB75)                                               | 2.22 | 0.00591 | 2.20  | 0.01483 | 0.84773 | 1.50 | 0.13871 | 1.12 | 0.37101 | 0.61381 |
| At4g01985 | expressed protein                                                                     | 2.20 | 0.00571 | 2.56  | 0.00061 | 0.33088 | 1.46 | 0.77238 | 1.20 | 0.04620 | 0.48248 |
| At2g37770 | aldo/keto reductase family protein                                                    | 2.20 | 0.02055 | 7.56  | 0.00111 | 0.05614 | 1.48 | 0.03029 | 1.57 | 0.02224 | 0.79676 |
| At2g37760 | aldo/keto reductase family protein                                                    | 2.19 | 0.00054 | 4.30  | 0.00003 | 0.01311 | 1.35 | 0.01631 | 1.40 | 0.02293 | 0.61426 |
| At1g17420 | lipoxygenase (LOX), putative similar to lipoxygenase gi:1495804 [Solanum tuberosum]   | 2.17 | 0.02857 | 3.01  | 0.05762 | 0.53818 | 1.12 | 0.23249 | 1.01 | 0.52954 | 0.16828 |
| At3g20470 | pseudogene, glycine-rich protein                                                      | 2.15 | 0.00003 | 1.22  | 0.87013 | 0.00183 | 1.40 | 0.28142 | 1.59 | 0.00683 | 0.39198 |
| At1g52890 | no apical meristem (NAM) family protein                                               | 2.15 | 0.00021 | 5.88  | 0.00052 | 0.02361 | 1.21 | 0.00945 | 1.53 | 0.00845 | 0.20742 |
| At2g16630 | proline-rich family protein                                                           | 2.14 | 0.00737 | 2.26  | 0.00241 | 0.69895 | 1.24 | 0.06756 | 1.00 | 0.60927 | 0.16890 |
| At1g60190 | armadillo/beta-catenin repeat family protein / U-box domain-containing protein        | 2.13 | 0.00612 | 2.26  | 0.00627 | 0.72719 | 1.71 | 0.50723 | 1.07 | 0.61874 | 0.50025 |
| At5g28237 | tryptophan synthase, beta subunit, putative                                           | 2.13 | 0.01947 | 2.87  | 0.02277 | 0.34330 | 1.00 | 0.73957 | 1.00 | 0.82205 | 1.00000 |
| At2g06050 | 12-oxophytodienoate reductase (OPR3) / delayed dehiscence1 (DDE1)                     | 2.13 | 0.01970 | 2.72  | 0.01193 | 0.27879 | 1.06 | 0.32330 | 1.08 | 0.52190 | 0.95987 |
| At3g17110 | pseudogene, glycine-rich protein                                                      | 2.12 | 0.00728 | 2.93  | 0.00099 | 0.14698 | 1.23 | 0.78905 | 1.29 | 0.66741 | 0.74071 |
| At5g61820 | expressed protein                                                                     | 2.12 | 0.00022 | 11.61 | 0.00001 | 0.00012 | 1.52 | 0.43226 | 1.55 | 0.22471 | 0.82158 |
| At3g22800 | leucine-rich repeat family protein / extensin family protein                          | 2.10 | 0.02515 | 2.80  | 0.09184 | 0.47395 | 1.00 | 0.00460 | 1.00 | 0.04217 | 1.00000 |
| At5g26960 | kelch repeat-containing F-box family protein                                          | 2.09 | 0.01791 | 2.25  | 0.13533 | 0.76727 | 1.37 | 0.08981 | 1.40 | 0.17994 | 0.74048 |
| At4g36010 | pathogenesis-related thaumatin family protein                                         | 2.07 | 0.00729 | 2.09  | 0.01684 | 0.78132 | 1.04 | 0.25796 | 1.06 | 0.39602 | 0.79751 |
| At5g44310 | late embryogenesis abundant domain-containing protein / LEA domain-containing protein | 2.05 | 0.45418 | 3.23  | 0.22359 | 0.18434 | 1.53 | 0.04608 | 1.51 | 0.10239 | 0.94801 |
| At4g18280 | glycine-rich cell wall protein-related                                                | 2.04 | 0.00000 | 1.22  | 0.00412 | 0.00279 | 1.23 | 0.00628 | 0.99 | 0.11532 | 0.35223 |
| At1g02405 | proline-rich family protein                                                           | 2.04 | 0.00158 | 2.15  | 0.03831 | 0.94615 | 1.44 | 0.21356 | 1.41 | 0.59994 | 0.76005 |
| At3g22620 | protease inhibitor/seed storage/lipid transfer protein (LTP) family protein           | 2.04 | 0.01250 | 1.12  | 0.17245 | 0.16464 | 5.34 | 0.00000 | 1.60 | 0.01847 | 0.00050 |
| At4g31800 | WRKY family transcription factor                                                      | 2.02 | 0.00841 | 1.75  | 0.09892 | 0.40921 | 0.98 | 0.32108 | 1.34 | 0.31521 | 0.37508 |
| At1g54575 | expressed protein                                                                     | 2.02 | 0.02027 | 4.95  | 0.00082 | 0.03623 | 1.87 | 0.12852 | 1.49 | 0.07464 | 0.93151 |
| At4g01985 | expressed protein                                                                     | 2.02 | 0.03950 | 1.70  | 0.30774 | 0.56738 | 1.67 | 0.20903 | 1.69 | 0.00595 | 0.74961 |
| At5g09440 | phosphate-responsive protein, putative                                                | 2.02 | 0.00399 | 4.52  | 0.00061 | 0.03377 | 1.48 | 0.01741 | 1.89 | 0.01025 | 0.23313 |
| At2g30560 | glycine-rich protein                                                                  | 2.01 | 0.02473 | 2.86  | 0.01326 | 0.14491 | 1.05 | 0.01903 | 1.08 | 0.11913 | 0.73970 |
| At4g16590 | glucosyltransferase-related                                                           | 2.01 | 0.02595 | 1.42  | 0.68974 | 0.38598 | 1.37 | 0.04143 | 1.21 | 0.44655 | 0.56275 |
| At2g25000 | WRKY family transcription factor                                                      | 2.01 | 0.02743 | 1.92  | 0.17441 | 0.72831 | 1.99 | 0.04441 | 2.57 | 0.04097 | 0.34469 |
| At4g20860 | FAD-binding domain-containing protein                                                 | 2.01 | 0.00784 | 2.03  | 0.01802 | 0.90266 | 1.29 | 0.10625 | 1.62 | 0.03880 | 0.02253 |
| At5g28640 | SSXT protein-related / glycine-rich protein                                           | 2.01 | 0.00047 | 2.04  | 0.01932 | 0.96096 | 1.11 | 0.00297 | 1.00 | 0.00034 | 0.35477 |
| At1g17420 | lipoxygenase, putative                                                                | 2.00 | 0.02231 | 3.54  | 0.01049 | 0.00869 | 1.10 | 0.43984 | 1.02 | 0.70173 | 0.56228 |
| At1g11580 | pectin methylesterase, putative                                                       | 2.00 | 0.00716 | 3.33  | 0.00063 | 0.06609 | 1.37 | 0.03367 | 1.77 | 0.03997 | 0.18507 |
| At2g16890 | UDP-glucuronosyl/UDP-glucosyl transferase family protein                              | 2.00 | 0.01569 | 1.79  | 0.00496 | 0.96757 | 1.00 | 0.59928 | 1.00 | 0.72184 | 1.00000 |
| At4g20390 | integral membrane family protein                                                      | 1.99 | 0.01234 | 2.86  | 0.00075 | 0.12383 | 1.19 | 0.27597 | 1.28 | 0.75764 | 0.61137 |
| At1g62240 | expressed protein                                                                     | 1.98 | 0.00076 | 2.43  | 0.05429 | 0.58702 | 1.33 | 0.57685 | 1.40 | 0.96524 | 0.75384 |
| At4g22470 | protease inhibitor/seed storage/lipid transfer protein (LTP) family protein           | 1.97 | 0.00024 | 1.96  | 0.01641 | 0.81311 | 1.47 | 0.02406 | 2.52 | 0.00147 | 0.01959 |
| At3g24600 | hypothetical protein                                                                  | 1.96 | 0.02596 | 2.01  | 0.10108 | 0.95805 | 1.00 | 0.23460 | 1.00 | 0.41617 | 1.00000 |
| At1g73330 | protease inhibitor, putative (DR4)                                                    | 1.96 | 0.00067 | 1.11  | 0.13595 | 0.03095 | 2.14 | 0.00156 | 2.61 | 0.00020 | 0.31828 |
| At4g17440 | expressed protein                                                                     | 1.94 | 0.00628 | 2.86  | 0.00270 | 0.04399 | 1.26 | 0.58249 | 1.35 | 0.97486 | 0.60850 |
| At5g41120 | esterase/lipase/thioesterase family protein                                           | 1.94 | 0.00764 | 1.93  | 0.00832 | 0.81538 | 1.00 | 0.29116 | 1.00 | 0.47134 | 1.00000 |
| At5g05340 | peroxidase, putative                                                                  | 1.94 | 0.00234 | 3.03  | 0.00328 | 0.29590 | 2.96 | 0.00001 | 1.56 | 0.00298 | 0.01516 |
| At4g20970 | basic helix-loop-helix (bHLH) family protein                                          | 1.93 | 0.00266 | 1.37  | 0.03649 | 0.18663 | 1.00 | 0.76711 | 1.00 | 0.84122 | 1.00000 |
| At2g47180 | galactinol synthase, putative                                                         | 1.93 | 0.00063 | 2.99  | 0.00016 | 0.03856 | 1.24 | 0.01406 | 1.32 | 0.06378 | 0.80737 |
| At4g29230 | no apical meristem (NAM) family protein                                               | 1.93 | 0.00452 | 2.37  | 0.11303 | 0.76821 | 1.07 | 0.01528 | 1.04 | 0.02464 | 0.71810 |
| At1g13300 | myb family transcription factor                                                       | 1.92 | 0.03990 | 3.01  | 0.05213 | 0.35275 | 1.00 | 0.17641 | 1.00 | 0.35345 | 1.00000 |
| At4g15440 | hydroperoxide lyase (HPL1)                                                            | 1.92 | 0.00202 | 2.88  | 0.00017 | 0.13572 | 1.00 | 0.05731 | 1.26 | 0.02693 | 0.19611 |
| At2g35710 | glycogenin glucosyltransferase (glycogenin)-related                                   | 1.92 | 0.04462 | 1.87  | 0.09270 | 0.95213 | 1.00 | 0.74975 | 1.00 | 0.82916 | 1.00000 |
| At1g19190 | expressed protein                                                                     | 1.91 | 0.02871 | 1.84  | 0.01651 | 0.95990 | 1.21 | 0.29169 | 1.20 | 0.41549 | 0.96888 |
| At2g32510 | protein kinase family protein                                                         | 1.90 | 0.02667 | 2.60  | 0.00346 | 0.30157 | 1.01 | 0.30821 | 1.00 | 0.45896 | 0.70997 |
| At5g03210 | expressed protein                                                                     | 1.90 | 0.00846 | 2.14  | 0.00711 | 0.51453 | 2.82 | 0.53419 | 1.08 | 0.94660 | 0.65877 |
| At3g07195 | proline-rich family protein                                                           | 1.90 | 0.00051 | 1.95  | 0.00305 | 0.78313 | 1.00 | 0.31164 | 0.98 | 0.37977 | 0.75414 |
| At4g02360 | expressed protein                                                                     | 1.90 | 0.00057 | 3.39  | 0.00181 | 0.11170 | 1.35 | 0.06123 | 1.17 | 0.04871 | 0.97059 |
| At1g27710 | glycine-rich protein                                                                  | 1.89 | 0.03769 | 1.68  | 0.58188 | 0.51309 | 1.29 | 0.56473 | 1.39 | 0.56026 | 0.55113 |
| At1g76790 | O-methyltransferase family 2 protein                                                  | 1.89 | 0.02472 | 3.12  | 0.00180 | 0.13014 | 1.00 | 0.11566 | 1.00 | 0.27772 | 1.00000 |
| At1g80120 | expressed protein                                                                     | 1.89 | 0.00008 | 2.25  | 0.00011 | 0.15631 | 0.99 | 0.43829 | 0.97 | 0.67148 | 0.87519 |
| At1g05300 | metal transporter, putative (ZIP5)                                                    | 1.89 | 0.00585 | 0.96  | 0.86669 | 0.03807 | 1.00 | 0.64925 | 1.00 | 0.75811 | 1.00000 |
| At2g17110 | expressed protein                                                                     | 1.88 | 0.01918 | 2.19  | 0.00138 | 0.33865 | 1.28 | 0.70399 | 1.30 | 0.59777 | 0.84681 |
| No match  | unknown protein                                                                       | 1.88 | 0.02295 | 1.89  | 0.03008 | 0.90821 | 1.33 | 0.83631 | 1.11 | 0.42367 | 0.77531 |
| At1g62660 | beta-fructosidase (BFRUCT3) / beta-fructofuranosidase / invertase, vacuolar           | 1.87 | 0.00487 | 2.05  | 0.00147 | 0.55366 | 1.26 | 0.01323 | 1.71 | 0.02111 | 0.15592 |
| At1g31750 | proline-rich family protein                                                           | 1.87 | 0.02673 | 1.96  | 0.09913 | 0.87368 | 1.01 | 0.26253 | 1.00 | 0.41529 | 0.34629 |
| At3g50970 | dehydrin xero2 (XERO2) / low-temperature-induced protein LTI30 (LTI30)                | 1.87 | 0.00750 | 2.10  | 0.00120 | 0.50679 | 1.36 | 0.04467 | 1.25 | 0.10165 | 0.85532 |

|           |                                                                                  |      |         |      |         |                |      |         |      |         |                |
|-----------|----------------------------------------------------------------------------------|------|---------|------|---------|----------------|------|---------|------|---------|----------------|
| At3g28630 | expressed protein                                                                | 1.86 | 0.00085 | 2.21 | 0.00893 | <b>0.50842</b> | 1.00 | 0.47297 | 1.00 | 0.62609 | <b>1.00000</b> |
| At2g36830 | major intrinsic family protein / MIP family protein                              | 1.86 | 0.00658 | 3.63 | 0.00610 | <b>0.08631</b> | 1.59 | 0.15574 | 1.42 | 0.32892 | <b>0.71212</b> |
| At4g28290 | expressed protein                                                                | 1.86 | 0.00851 | 2.26 | 0.00394 | <b>0.30904</b> | 1.24 | 0.20642 | 1.38 | 0.15616 | <b>0.38955</b> |
| At5g55050 | GDSL-motif lipase/hydrolase family protein                                       | 1.86 | 0.00002 | 1.46 | 0.00938 | <b>0.11923</b> | 1.04 | 0.06012 | 0.92 | 0.69906 | <b>0.15328</b> |
| At2g38400 | alanine--glyoxylate aminotransferase, putative / beta-alanine-pyruvate aminot    | 1.85 | 0.01811 | 2.45 | 0.01246 | <b>0.36846</b> | 1.20 | 0.15706 | 1.30 | 0.16430 | <b>0.44058</b> |
| At2g28570 | expressed protein                                                                | 1.85 | 0.03998 | 3.22 | 0.01109 | <b>0.15341</b> | 1.00 | 0.15239 | 1.00 | 0.32508 | <b>1.00000</b> |
| At3g43270 | pectinesterase family protein                                                    | 1.85 | 0.00028 | 2.17 | 0.00983 | <b>0.68679</b> | 2.23 | 0.00011 | 1.58 | 0.00850 | <b>0.10541</b> |
| At3g15210 | ethylene-responsive element-binding factor 4 (ERF4)                              | 1.85 | 0.00398 | 2.34 | 0.00125 | <b>0.34185</b> | 1.22 | 0.39357 | 1.71 | 0.03355 | <b>0.25648</b> |
| At1g54650 | (hypothetical protein                                                            | 1.85 | 0.00051 | 2.16 | 0.00381 | <b>0.40641</b> | 1.39 | 0.12079 | 1.27 | 0.35154 | <b>0.64355</b> |
| At5g48470 | expressed protein                                                                | 1.84 | 0.00286 | 1.55 | 0.01705 | <b>0.57035</b> | 1.19 | 0.04715 | 1.13 | 0.05635 | <b>0.84898</b> |
| At4g22900 | expressed protein                                                                | 1.84 | 0.01644 | 2.17 | 0.03176 | <b>0.50426</b> | 1.00 | 0.27404 | 1.00 | 0.45513 | <b>1.00000</b> |
| At5g18960 | far-red impaired responsive protein, putative                                    | 1.84 | 0.00808 | 1.78 | 0.06617 | <b>0.74545</b> | 0.96 | 0.86867 | 0.96 | 0.89522 | <b>0.95017</b> |
| At1g53490 | bZIP protein                                                                     | 1.84 | 0.02044 | 2.25 | 0.00985 | <b>0.27607</b> | 1.01 | 0.00482 | 0.96 | 0.02465 | <b>0.14158</b> |
| At1g24575 | expressed protein                                                                | 1.84 | 0.00120 | 2.62 | 0.00004 | <b>0.06583</b> | 1.14 | 0.27234 | 1.02 | 0.57569 | <b>0.59553</b> |
| At4g28140 | AP2 domain-containing transcription factor, putative                             | 1.83 | 0.04139 | 1.32 | 0.11228 | <b>0.60792</b> | 1.00 | 0.22372 | 1.00 | 0.40497 | <b>1.00000</b> |
| At3g15720 | glycoside hydrolase family 28 protein / polygalacturonase (pectinase) family pr  | 1.83 | 0.00024 | 2.40 | 0.00000 | <b>0.07736</b> | 1.00 | 0.27142 | 1.00 | 0.45261 | <b>1.00000</b> |
| At4g28810 | expressed protein                                                                | 1.83 | 0.01359 | 1.95 | 0.01734 | <b>0.77004</b> | 1.00 | 0.33967 | 1.00 | 0.51541 | <b>1.00000</b> |
| At2g02060 | calcium-dependent protein kinase-related / CDPK-related                          | 1.82 | 0.02027 | 3.03 | 0.01857 | <b>0.16464</b> | 1.00 | 0.01486 | 1.00 | 0.08482 | <b>1.00000</b> |
| At3g03990 | esterase/lipase/thioesterase family protein                                      | 1.82 | 0.00012 | 1.80 | 0.01681 | <b>0.80542</b> | 1.13 | 0.84911 | 1.23 | 0.48894 | <b>0.42050</b> |
| At3g24250 | glycine-rich protein                                                             | 1.82 | 0.02498 | 2.20 | 0.04364 | <b>0.63373</b> | 1.00 | 0.00235 | 1.00 | 0.02805 | <b>1.00000</b> |
| At4g24120 | transporter, putative                                                            | 1.82 | 0.00315 | 1.94 | 0.01961 | <b>0.83861</b> | 1.20 | 0.42257 | 1.11 | 0.69004 | <b>0.73904</b> |
| At5g11430 | transcription elongation factor-related                                          | 1.81 | 0.02744 | 2.48 | 0.00952 | <b>0.16425</b> | 1.01 | 0.08100 | 0.94 | 0.11567 | <b>0.12271</b> |
| At4g18440 | adenylosuccinate lyase, putative / adenylosuccinase, putative                    | 1.81 | 0.03597 | 2.25 | 0.00169 | <b>0.38792</b> | 1.23 | 0.14369 | 1.51 | 0.08931 | <b>0.50881</b> |
| At2g18500 | ovate family protein                                                             | 1.81 | 0.00769 | 2.29 | 0.00090 | <b>0.23373</b> | 1.00 | 0.84836 | 1.00 | 0.89713 | <b>1.00000</b> |
| At1g69870 | proton-dependent oligopeptide transport (POT) family protein                     | 1.81 | 0.00136 | 1.95 | 0.00569 | <b>0.67797</b> | 1.25 | 0.02193 | 1.36 | 0.05013 | <b>0.65658</b> |
| At4g15460 | glycine-rich protein                                                             | 1.79 | 0.03636 | 2.24 | 0.00948 | <b>0.32406</b> | 1.00 | 0.01461 | 1.00 | 0.08396 | <b>1.00000</b> |
| At3g48350 | cysteine proteinase, putative                                                    | 1.78 | 0.00071 | 2.14 | 0.00197 | <b>0.37109</b> | 1.24 | 0.02135 | 1.49 | 0.03677 | <b>0.41586</b> |
| At1g22340 | UDP-glucuronosyl/UDP-glucosyl transferase family protein                         | 1.77 | 0.00409 | 2.02 | 0.02311 | <b>0.52074</b> | 1.06 | 0.24361 | 1.05 | 0.35030 | <b>0.84290</b> |
| At4g21470 | riboflavin kinase/FAD synthetase family protein                                  | 1.77 | 0.01325 | 1.32 | 0.07302 | <b>0.44978</b> | 0.98 | 0.44388 | 0.96 | 0.50165 | <b>0.97687</b> |
| At1g21980 | 1-phosphatidylinositol-4-phosphate 5-kinase, putative / PIP kinase, putative /   | 1.76 | 0.03337 | 1.96 | 0.04168 | <b>0.30026</b> | 1.22 | 0.39917 | 1.04 | 0.11174 | <b>0.16307</b> |
| At3g13900 | haloacid dehalogenase-like hydrolase family protein                              | 1.76 | 0.04890 | 1.39 | 0.03712 | <b>0.62405</b> | 1.00 | 0.91095 | 0.95 | 0.51618 | <b>0.17047</b> |
| At1g51880 | putative protein kinase                                                          | 1.75 | 0.01358 | 2.26 | 0.17876 | <b>0.56446</b> | 1.00 | 0.00001 | 1.00 | 0.00074 | <b>1.00000</b> |
| At5g53120 | spermidine synthase, putative / putrescine aminopropyltransferase, putative      | 1.75 | 0.00304 | 2.49 | 0.00180 | <b>0.02330</b> | 1.16 | 0.64100 | 0.95 | 0.67876 | <b>0.48759</b> |
| At2g27390 | proline-rich family protein                                                      | 1.75 | 0.01544 | 2.07 | 0.01373 | <b>0.53906</b> | 1.18 | 0.96624 | 1.13 | 0.85044 | <b>0.89032</b> |
| At1g21530 | amp-binding protein, putative                                                    | 1.75 | 0.03616 | 3.95 | 0.02937 | <b>0.11137</b> | 1.00 | 0.01551 | 1.00 | 0.08698 | <b>1.00000</b> |
| At2g20550 | DNAJ chaperone C-terminal domain-containing protein                              | 1.74 | 0.02065 | 2.68 | 0.00431 | <b>0.01699</b> | 1.16 | 0.75429 | 1.04 | 0.40971 | <b>0.15884</b> |
| At4g23670 | major latex protein-related / MLP-related                                        | 1.74 | 0.00225 | 1.96 | 0.00376 | <b>0.55252</b> | 1.18 | 0.20369 | 1.27 | 0.08943 | <b>0.61454</b> |
| At2g04795 | expressed protein                                                                | 1.74 | 0.01721 | 1.58 | 0.00196 | <b>0.91902</b> | 1.06 | 0.55822 | 0.97 | 0.63150 | <b>0.46639</b> |
| At5g13490 | ADP, ATP carrier protein 2, mitochondrial / ADP/ATP translocase 2 / adenine nu   | 1.74 | 0.00671 | 2.60 | 0.00551 | <b>0.13798</b> | 1.05 | 0.41381 | 1.18 | 0.81363 | <b>0.34023</b> |
| At1g06640 | 2-oxoglutarate-dependent dioxygenase, putative                                   | 1.73 | 0.01058 | 2.38 | 0.00011 | <b>0.10223</b> | 1.12 | 0.92588 | 1.33 | 0.17218 | <b>0.10351</b> |
| At1g52720 | expressed protein                                                                | 1.73 | 0.00226 | 2.43 | 0.00351 | <b>0.13250</b> | 1.20 | 0.01218 | 1.28 | 0.04482 | <b>0.55875</b> |
| At2g29440 | glutathione S-transferase, putative                                              | 1.73 | 0.00499 | 2.98 | 0.00488 | <b>0.01922</b> | 1.37 | 0.03580 | 1.37 | 0.09355 | <b>0.88693</b> |
| At2g30320 | tRNA pseudouridine synthase family protein                                       | 1.73 | 0.04645 | 1.72 | 0.28053 | <b>0.84377</b> | 1.21 | 0.24713 | 1.23 | 0.40682 | <b>0.91718</b> |
| At3g28500 | 60S acidic ribosomal protein P2 (RPP2C)                                          | 1.73 | 0.00391 | 1.76 | 0.01270 | <b>0.80386</b> | 1.00 | 0.97709 | 1.00 | 0.98451 | <b>1.00000</b> |
| At4g14746 | expressed protein                                                                | 1.72 | 0.03564 | 1.37 | 0.31726 | <b>0.41841</b> | 1.25 | 0.28531 | 1.17 | 0.62148 | <b>0.70471</b> |
| At3g05640 | protein phosphatase 2C, putative / PP2C, putative                                | 1.72 | 0.00196 | 1.52 | 0.01910 | <b>0.51178</b> | 1.66 | 0.01186 | 1.52 | 0.02011 | <b>0.90955</b> |
| At4g37240 | expressed protein                                                                | 1.72 | 0.03049 | 1.91 | 0.03468 | <b>0.35998</b> | 1.15 | 0.73217 | 0.96 | 0.27214 | <b>0.25921</b> |
| At3g06500 | beta-fructofuranosidase, putative / invertase, putative / saccharase, putative / | 1.71 | 0.00468 | 2.92 | 0.00546 | <b>0.11601</b> | 1.24 | 0.05098 | 1.70 | 0.01891 | <b>0.06487</b> |
| At3g60080 | zinc finger (C3HC4-type RING finger) family protein                              | 1.71 | 0.00318 | 1.65 | 0.25407 | <b>0.61730</b> | 1.18 | 0.83499 | 1.07 | 0.33417 | <b>0.22270</b> |
| At1g70700 | expressed protein                                                                | 1.71 | 0.00307 | 2.30 | 0.00526 | <b>0.23341</b> | 1.48 | 0.00213 | 1.80 | 0.01196 | <b>0.14289</b> |
| At2g15490 | UDP-glucuronosyl/UDP-glucosyl transferase family protein                         | 1.71 | 0.01183 | 3.98 | 0.00155 | <b>0.01472</b> | 1.14 | 0.19868 | 1.20 | 0.64149 | <b>0.60662</b> |
| At4g15530 | pyruvate phosphate dikinase family protein                                       | 1.71 | 0.00148 | 2.72 | 0.00036 | <b>0.00797</b> | 1.00 | 0.65913 | 0.80 | 0.12397 | <b>0.16521</b> |
| At3g26400 | eukaryotic translation initiation factor 4B, putative/ eIF-4B, putative          | 1.70 | 0.00274 | 1.89 | 0.00051 | <b>0.37556</b> | 1.16 | 0.92128 | 1.24 | 0.48734 | <b>0.55971</b> |
| At4g13180 | short-chain dehydrogenase/reductase (SDR) family protein                         | 1.70 | 0.01773 | 4.05 | 0.00116 | <b>0.00095</b> | 1.05 | 0.28075 | 1.25 | 0.95594 | <b>0.43428</b> |
| At3g24420 | hydrolase, alpha/beta fold family protein                                        | 1.70 | 0.04048 | 1.19 | 0.85435 | <b>0.13990</b> | 1.10 | 0.38590 | 1.20 | 0.84494 | <b>0.75643</b> |
| At1g32640 | basic helix-loop-helix (bHLH) protein (RAP-1)                                    | 1.70 | 0.00538 | 1.82 | 0.00681 | <b>0.69306</b> | 1.09 | 0.03996 | 1.33 | 0.02882 | <b>0.01254</b> |
| At4g11570 | haloacid dehalogenase-like hydrolase family protein                              | 1.70 | 0.00190 | 1.96 | 0.00218 | <b>0.48851</b> | 1.14 | 0.22885 | 1.21 | 0.04735 | <b>0.45842</b> |
| At2g34810 | FAD-binding domain-containing protein                                            | 1.70 | 0.00680 | 4.04 | 0.00095 | <b>0.01444</b> | 1.72 | 0.00410 | 2.01 | 0.00618 | <b>0.33545</b> |
| At4g36990 | heat shock factor protein 4 (HSF4) / heat shock transcription factor 4 (HSTF4)   | 1.69 | 0.00365 | 2.25 | 0.00077 | <b>0.07572</b> | 1.07 | 0.78291 | 1.20 | 0.69288 | <b>0.83791</b> |
| At5g13220 | expressed protein                                                                | 1.69 | 0.00242 | 3.52 | 0.00413 | <b>0.00872</b> | 1.00 | 0.03335 | 1.00 | 0.13599 | <b>1.00000</b> |
| At4g12290 | copper amine oxidase, putative                                                   | 1.68 | 0.03785 | 2.94 | 0.00423 | <b>0.02105</b> | 1.00 | 0.91076 | 1.35 | 0.24930 | <b>0.28064</b> |
| At5g50915 | basic helix-loop-helix (bHLH) family protein                                     | 1.68 | 0.02476 | 2.59 | 0.01243 | <b>0.23350</b> | 1.44 | 0.03268 | 1.27 | 0.29787 | <b>0.55315</b> |
| At5g48540 | 33 kDa secretory protein-related                                                 | 1.68 | 0.00220 | 2.47 | 0.00315 | <b>0.08054</b> | 1.37 | 0.04447 | 1.56 | 0.06188 | <b>0.51279</b> |
| At3g22860 | eukaryotic translation initiation factor 3 subunit 8, putative / eIF3c, putative | 1.68 | 0.00709 | 1.62 | 0.02463 | <b>0.87413</b> | 1.00 | 0.10970 | 1.00 | 0.26944 | <b>1.00000</b> |
| At2g39980 | transferase family protein                                                       | 1.67 | 0.01056 | 1.73 | 0.04107 | <b>0.88374</b> | 1.13 | 0.30424 | 0.96 | 0.96277 | <b>0.09750</b> |

|           |                                                                                  |      |         |      |         |         |      |         |      |         |         |
|-----------|----------------------------------------------------------------------------------|------|---------|------|---------|---------|------|---------|------|---------|---------|
| At4g27510 | expressed protein                                                                | 1.67 | 0.04511 | 2.50 | 0.64420 | 0.38427 | 1.03 | 0.00014 | 1.10 | 0.00765 | 0.39005 |
| At4g37650 | short-root transcription factor (SHR)                                            | 1.67 | 0.00060 | 1.51 | 0.01536 | 0.36651 | 1.13 | 0.55656 | 1.05 | 0.89310 | 0.49454 |
| At2g41380 | embryo-abundant protein-related                                                  | 1.67 | 0.02458 | 2.62 | 0.06381 | 0.50370 | 1.01 | 0.64734 | 1.33 | 0.11293 | 0.08992 |
| At5g64750 | AP2 domain-containing transcription factor, putative                             | 1.67 | 0.01812 | 2.37 | 0.00620 | 0.18878 | 1.00 | 0.23896 | 1.00 | 0.42060 | 1.00000 |
| At3g61490 | glycoside hydrolase family 28 protein / polygalacturonase (pectinase) family pr  | 1.67 | 0.00884 | 3.63 | 0.00111 | 0.03681 | 1.00 | 0.57143 | 1.00 | 0.70128 | 1.00000 |
| At2g39200 | seven transmembrane MLO family protein / MLO-like protein 12 (MLO12)             | 1.67 | 0.01166 | 0.98 | 0.54228 | 0.08908 | 1.00 | 0.21048 | 1.00 | 0.39105 | 1.00000 |
| At1g45145 | thioredoxin H-type 5 (TRX-H-5) (TOUL)                                            | 1.66 | 0.00484 | 2.33 | 0.00181 | 0.11352 | 1.31 | 0.07046 | 1.72 | 0.00953 | 0.25381 |
| At1g58360 | amino acid permease I (AAP1)                                                     | 1.66 | 0.03127 | 2.77 | 0.00032 | 0.05320 | 1.69 | 0.03043 | 1.48 | 0.13658 | 0.71029 |
| At2g38540 | nonspecific lipid transfer protein 1 (LTP1)                                      | 1.66 | 0.00213 | 1.45 | 0.01414 | 0.36805 | 1.58 | 0.14263 | 1.36 | 0.05152 | 0.74858 |
| At2g06050 | 12-oxo-phytyldienoate reductase                                                  | 1.65 | 0.01892 | 1.77 | 0.03414 | 0.56625 | 1.04 | 0.24580 | 1.12 | 0.31826 | 0.52162 |
| At4g13110 | BSD domain-containing protein                                                    | 1.64 | 0.00909 | 1.63 | 0.03729 | 0.99784 | 1.14 | 0.11473 | 1.27 | 0.12562 | 0.18755 |
| At2g34930 | disease resistance family protein                                                | 1.64 | 0.00575 | 2.21 | 0.01897 | 0.24578 | 1.02 | 0.09894 | 1.00 | 0.27640 | 0.51649 |
| At1g18630 | glycine-rich RNA-binding protein, putative                                       | 1.63 | 0.00005 | 1.96 | 0.00002 | 0.01886 | 1.16 | 0.04813 | 1.20 | 0.20938 | 0.54772 |
| At1g19610 | plant defensin-fusion protein, putative (PDF1.4)                                 | 1.63 | 0.00672 | 1.85 | 0.00053 | 0.48890 | 1.00 | 0.60867 | 1.13 | 0.21353 | 0.17047 |
| At4g27860 | integral membrane family protein                                                 | 1.62 | 0.04346 | 2.02 | 0.00779 | 0.32304 | 1.13 | 0.32989 | 1.67 | 0.01992 | 0.01417 |
| At4g34710 | arginine decarboxylase 2 (SPE2)                                                  | 1.62 | 0.00462 | 3.39 | 0.00068 | 0.00955 | 1.23 | 0.04160 | 1.02 | 0.41522 | 0.40735 |
| At1g13020 | eukaryotic translation initiation factor, putative (EIF4B5)                      | 1.62 | 0.01088 | 1.67 | 0.02825 | 0.79743 | 1.25 | 0.99017 | 1.05 | 0.09868 | 0.11651 |
| At3g47950 | ATPase, plasma membrane-type, putative / proton pump, putative                   | 1.62 | 0.00215 | 1.85 | 0.00781 | 0.40740 | 1.29 | 0.00940 | 1.25 | 0.07625 | 0.73609 |
| At4g24510 | eceriferum protein (CER2)                                                        | 1.62 | 0.00048 | 1.07 | 0.91912 | 0.00351 | 1.04 | 0.77250 | 0.95 | 0.34673 | 0.51208 |
| At5g39050 | transferase family protein                                                       | 1.62 | 0.00441 | 3.98 | 0.00046 | 0.00236 | 1.23 | 0.44429 | 1.29 | 0.71589 | 0.99319 |
| At3g54850 | armadillo/beta-catenin repeat family protein / U-box domain-containing family    | 1.62 | 0.03391 | 1.45 | 0.13870 | 0.66885 | 1.12 | 0.46046 | 1.30 | 0.23464 | 0.23026 |
| At1g77120 | alcohol dehydrogenase (ADH)                                                      | 1.62 | 0.04366 | 2.42 | 0.00031 | 0.13279 | 1.05 | 0.98172 | 1.01 | 0.67996 | 0.64896 |
| At2g39210 | nodulin family protein                                                           | 1.61 | 0.02267 | 1.15 | 0.85583 | 0.15889 | 1.03 | 0.41706 | 0.94 | 0.24721 | 0.59599 |
| At5g11260 | bZIP protein HY5 (HY5)                                                           | 1.61 | 0.00879 | 1.99 | 0.02784 | 0.29123 | 1.19 | 0.38412 | 1.08 | 0.79689 | 0.57784 |
| At1g29730 | putative receptor-like serine/threonine kinase                                   | 1.61 | 0.00059 | 2.51 | 0.10866 | 0.31810 | 1.11 | 0.00000 | 1.03 | 0.00002 | 0.66405 |
| At3g48450 | nitrate-responsive NOI protein, putative                                         | 1.61 | 0.03459 | 1.09 | 0.90321 | 0.13051 | 1.00 | 0.26082 | 1.00 | 0.44234 | 1.00000 |
| At2g46930 | pectinacetyltransferase, putative                                                | 1.61 | 0.00145 | 1.49 | 0.00346 | 0.60907 | 1.17 | 0.13411 | 1.23 | 0.09194 | 0.40166 |
| At3g45060 | high-affinity nitrate transporter, putative                                      | 1.61 | 0.01220 | 1.14 | 0.50261 | 0.19099 | 1.00 | 0.93107 | 1.00 | 0.95337 | 1.00000 |
| At3g16660 | expressed protein                                                                | 1.61 | 0.00355 | 1.73 | 0.05953 | 0.94518 | 1.15 | 0.25822 | 1.15 | 0.24502 | 0.95451 |
| At4g38810 | calcium-binding EF hand family protein                                           | 1.61 | 0.00122 | 2.01 | 0.00019 | 0.12522 | 1.32 | 0.00152 | 1.26 | 0.02969 | 0.57221 |
| At1g16850 | expressed protein                                                                | 1.60 | 0.01018 | 1.18 | 0.17118 | 0.41209 | 1.20 | 0.01545 | 0.88 | 0.42824 | 0.17167 |
| At1g79410 | transporter-related                                                              | 1.59 | 0.00777 | 2.12 | 0.00342 | 0.18444 | 1.04 | 0.97247 | 0.99 | 0.65684 | 0.48956 |
| At2g41890 | curculin-like (mannose-binding) lectin family protein / PAN domain-containing    | 1.59 | 0.00649 | 2.28 | 0.00001 | 0.09898 | 1.16 | 0.00127 | 1.13 | 0.04669 | 0.63188 |
| At3g04010 | glycosyl hydrolase family 17 protein                                             | 1.59 | 0.01048 | 1.90 | 0.00016 | 0.33912 | 1.00 | 0.92309 | 1.00 | 0.94797 | 1.00000 |
| At1g19570 | dehydroascorbate reductase, putative                                             | 1.59 | 0.00982 | 1.93 | 0.01410 | 0.50182 | 1.22 | 0.01782 | 1.21 | 0.08479 | 0.97662 |
| At4g02670 | zinc finger (C2H2 type) family protein                                           | 1.59 | 0.04463 | 2.39 | 0.02214 | 0.33752 | 1.00 | 0.93065 | 1.00 | 0.95309 | 1.00000 |
| At4g20110 | vacuolar sorting receptor, putative                                              | 1.59 | 0.02048 | 2.09 | 0.06016 | 0.50073 | 0.90 | 0.69708 | 0.94 | 0.93321 | 0.74565 |
| At4g15490 | UDP-glucuronosyl/UDP-glucosyl transferase family protein                         | 1.58 | 0.00377 | 3.96 | 0.00021 | 0.00065 | 1.20 | 0.39051 | 1.03 | 0.98570 | 0.48345 |
| At4g27410 | no apical meristem (NAM) family protein (RD26)                                   | 1.58 | 0.04758 | 1.76 | 0.06061 | 0.63768 | 2.02 | 0.08054 | 1.86 | 0.04033 | 0.75435 |
| At1g44100 | amino acid permease 5, putative (AAP5)                                           | 1.58 | 0.00322 | 1.28 | 0.07735 | 0.25785 | 1.16 | 0.11130 | 1.19 | 0.21246 | 0.90984 |
| At5g64920 | COP1-interacting protein (CIP8) / zinc finger (C3HC4-type RING finger) family    | 1.57 | 0.00056 | 1.69 | 0.00038 | 0.50134 | 1.10 | 0.81179 | 1.15 | 0.42743 | 0.58666 |
| At1g75900 | family II extracellular lipase 3 (EXL3)                                          | 1.57 | 0.03770 | 0.83 | 0.22820 | 0.04671 | 1.22 | 0.05435 | 1.18 | 0.19690 | 0.79070 |
| At5g57800 | CER1 protein, putative (WAX2)                                                    | 1.57 | 0.02854 | 1.21 | 0.71104 | 0.22803 | 1.23 | 0.15509 | 1.12 | 0.97979 | 0.26840 |
| At2g31990 | exostosin family protein                                                         | 1.57 | 0.04800 | 1.56 | 0.25343 | 0.88335 | 1.02 | 0.00120 | 1.10 | 0.07755 | 0.18187 |
| At4g21910 | MATE efflux family protein                                                       | 1.56 | 0.00481 | 1.73 | 0.00542 | 0.40620 | 1.23 | 0.20443 | 1.04 | 0.39048 | 0.68550 |
| At1g04980 | thioredoxin family protein                                                       | 1.56 | 0.04178 | 3.02 | 0.01465 | 0.04759 | 0.83 | 0.16881 | 0.79 | 0.24753 | 0.64291 |
| At2g46370 | auxin-responsive GH3 family protein                                              | 1.56 | 0.00450 | 2.02 | 0.00146 | 0.14459 | 0.94 | 0.46936 | 0.99 | 0.29106 | 0.63671 |
| At4g28520 | 12S seed storage protein, putative / cruciferin, putative                        | 1.56 | 0.02878 | 1.01 | 0.70729 | 0.13282 | 1.00 | 0.68227 | 1.00 | 0.78171 | 1.00000 |
| At4g37520 | peroxidase 50 (PER50) (P50) (PRXR2)                                              | 1.56 | 0.00999 | 3.16 | 0.00114 | 0.00523 | 1.01 | 0.46268 | 2.15 | 0.05325 | 0.05923 |
| At1g51090 | heavy-metal-associated domain-containing protein                                 | 1.55 | 0.00522 | 1.01 | 0.51957 | 0.04961 | 1.14 | 0.07708 | 1.28 | 0.20110 | 0.76015 |
| At3g26840 | esterase/lipase/thioesterase family protein                                      | 1.55 | 0.00339 | 4.50 | 0.00023 | 0.00260 | 1.06 | 0.83284 | 1.21 | 0.29968 | 0.32483 |
| At3g07180 | GPI transamidase component PIG-S-related                                         | 1.55 | 0.00367 | 1.49 | 0.07664 | 0.71367 | 1.04 | 0.45054 | 1.06 | 0.72937 | 0.68234 |
| At2g30140 | UDP-glucuronosyl/UDP-glucosyl transferase family protein                         | 1.55 | 0.03850 | 4.33 | 0.00080 | 0.00754 | 1.02 | 0.70937 | 1.09 | 0.85731 | 0.99204 |
| At3g47200 | expressed protein                                                                | 1.55 | 0.00972 | 2.56 | 0.00554 | 0.08195 | 1.00 | 0.54356 | 1.00 | 0.68042 | 1.00000 |
| At3g29575 | expressed protein                                                                | 1.55 | 0.00576 | 1.33 | 0.02882 | 0.60758 | 1.69 | 0.16675 | 0.91 | 0.49576 | 0.42844 |
| At3g56850 | ABA-responsive element-binding protein 3 (AREB3)                                 | 1.54 | 0.00107 | 1.42 | 0.03021 | 0.52895 | 1.26 | 0.04229 | 1.10 | 0.53017 | 0.23380 |
| At3g16460 | jacalin lectin family protein                                                    | 1.54 | 0.03423 | 1.98 | 0.00238 | 0.26500 | 0.97 | 0.88320 | 0.95 | 0.98185 | 0.91239 |
| At1g47960 | invertase/pectin methyltransferase inhibitor family protein                      | 1.54 | 0.02189 | 2.71 | 0.00056 | 0.00993 | 1.22 | 0.33350 | 1.46 | 0.09655 | 0.21256 |
| At2g24730 | 60S ribosomal protein L4/L1 (RPL4C), pseudogene                                  | 1.54 | 0.02323 | 1.79 | 0.02873 | 0.48724 | 1.25 | 0.38281 | 1.15 | 0.87742 | 0.61267 |
| At5g04250 | OTU-like cysteine protease family protein                                        | 1.54 | 0.01436 | 1.83 | 0.00003 | 0.29676 | 1.00 | 0.41550 | 1.00 | 0.57991 | 1.00000 |
| At4g25640 | MATE efflux family protein                                                       | 1.54 | 0.01600 | 1.61 | 0.05931 | 0.78251 | 1.14 | 0.52419 | 1.02 | 0.83180 | 0.26315 |
| At3g12145 | polygalacturonase inhibitor, putative / leucine-rich repeat protein (FLR1)       | 1.54 | 0.00983 | 2.65 | 0.00405 | 0.01887 | 1.14 | 0.08504 | 1.90 | 0.01624 | 0.00680 |
| No match  | unknown protein                                                                  | 1.54 | 0.04480 | 2.48 | 0.84629 | 0.25108 | 1.00 | 0.00011 | 1.00 | 0.00420 | 0.17047 |
| At1g08800 | expressed protein                                                                | 1.54 | 0.03624 | 1.44 | 0.04284 | 0.89440 | 1.06 | 0.37773 | 1.07 | 0.42238 | 0.86614 |
| At1g21160 | eukaryotic translation initiation factor 2 family protein / eIF-2 family protein | 1.54 | 0.03344 | 1.38 | 0.05273 | 0.73284 | 1.29 | 0.04985 | 1.35 | 0.03337 | 0.71609 |



|           |                                                                            |      |         |      |         |         |      |         |      |         |         |
|-----------|----------------------------------------------------------------------------|------|---------|------|---------|---------|------|---------|------|---------|---------|
| At5g36300 | pseudogene, pentatricopeptide (PPR) repeat-containing protein              | 1.54 | 0.03416 | 1.78 | 0.24392 | 0.63107 | 1.02 | 0.00005 | 1.02 | 0.00220 | 0.99150 |
| At1g28230 | purine permease (PUP1)                                                     | 1.53 | 0.02736 | 1.67 | 0.05327 | 0.81094 | 1.11 | 0.60942 | 1.29 | 0.04671 | 0.28430 |
| At1g52410 | caldesmon-related                                                          | 1.53 | 0.01401 | 2.42 | 0.00358 | 0.05247 | 1.61 | 0.01594 | 1.69 | 0.03059 | 0.73518 |
| At5g41400 | zinc finger (C3HC4-type RING finger) family protein                        | 1.53 | 0.03167 | 2.49 | 0.00745 | 0.05820 | 1.04 | 0.49685 | 0.87 | 0.10186 | 0.25591 |
| At2g31020 | oxysterol-binding family protein                                           | 1.53 | 0.01695 | 1.36 | 0.06024 | 0.51562 | 1.00 | 0.10141 | 1.00 | 0.25763 | 1.00000 |
| At1g62570 | flavin-containing monooxygenase family protein / FMO family protein        | 1.52 | 0.04832 | 2.45 | 0.00047 | 0.09360 | 0.97 | 0.58831 | 1.01 | 0.92477 | 0.60367 |
| At2g38750 | annexin 4 (ANN4)                                                           | 1.52 | 0.01471 | 1.39 | 0.02674 | 0.94729 | 1.31 | 0.00422 | 1.23 | 0.06469 | 0.61454 |
| At1g68875 | expressed protein                                                          | 1.52 | 0.03311 | 1.58 | 0.01266 | 0.76365 | 0.89 | 0.47270 | 1.00 | 0.76356 | 0.51649 |
| At2g27310 | F-box family protein                                                       | 1.52 | 0.02589 | 1.80 | 0.03890 | 0.20113 | 1.20 | 0.17299 | 1.22 | 0.31833 | 0.93519 |
| At2g41260 | glycine-rich protein / late embryogenesis abundant protein (M17)           | 1.52 | 0.00520 | 1.19 | 0.13516 | 0.16342 | 1.00 | 0.94645 | 1.00 | 0.96379 | 1.00000 |
| At4g02710 | kinase interacting family protein                                          | 1.52 | 0.04242 | 1.73 | 0.05637 | 0.49372 | 1.00 | 0.01747 | 0.98 | 0.06523 | 0.17047 |
| At3g07030 | pseudogene, similar to OSJNBa0042L16.13                                    | 1.51 | 0.02580 | 1.78 | 0.05068 | 0.50881 | 1.11 | 0.57480 | 1.22 | 0.93407 | 0.73192 |
| At5g63120 | ethylene-responsive DEAD box RNA helicase, putative (RH30)                 | 1.51 | 0.04663 | 2.08 | 0.00013 | 0.10535 | 1.18 | 0.09909 | 1.06 | 0.65526 | 0.02493 |
| At3g44770 | hypothetical protein                                                       | 1.51 | 0.03092 | 1.77 | 0.00420 | 0.43869 | 1.00 | 0.58705 | 1.00 | 0.71285 | 1.00000 |
| At3g07700 | ABC1 family protein                                                        | 1.51 | 0.01646 | 2.40 | 0.00029 | 0.02425 | 1.07 | 0.55658 | 1.01 | 0.93163 | 0.66537 |
| At1g17550 | protein phosphatase 2C-related / PP2C-related                              | 1.51 | 0.01983 | 1.35 | 0.10073 | 0.47077 | 1.01 | 0.52734 | 1.07 | 0.88146 | 0.72209 |
| At5g66580 | expressed protein                                                          | 1.51 | 0.04531 | 1.83 | 0.04702 | 0.22512 | 0.88 | 0.32917 | 1.06 | 0.98656 | 0.32635 |
| At4g10120 | sucrose-phosphate synthase, putative                                       | 1.50 | 0.03018 | 1.25 | 0.04941 | 0.57629 | 0.86 | 0.47210 | 0.65 | 0.05814 | 0.19391 |
| At2g28510 | Dof-type zinc finger domain-containing protein                             | 1.50 | 0.00101 | 2.32 | 0.00043 | 0.02787 | 1.24 | 0.00254 | 1.24 | 0.01584 | 0.95469 |
| At3g53640 | protein kinase family protein                                              | 1.50 | 0.03079 | 2.05 | 0.02795 | 0.41185 | 1.00 | 0.82841 | 1.00 | 0.88348 | 1.00000 |
| At3g23220 | ethylene-responsive element-binding protein, putative                      | 1.50 | 0.03738 | 1.90 | 0.00878 | 0.06262 | 1.23 | 0.73895 | 1.15 | 0.42601 | 0.78784 |
| At3g22670 | pentatricopeptide (PPR) repeat-containing protein                          | 1.50 | 0.03182 | 1.29 | 0.03345 | 0.70778 | 1.00 | 0.13530 | 1.00 | 0.30373 | 1.00000 |
| At1g77855 | hypothetical protein                                                       | 1.50 | 0.01934 | 1.78 | 0.08184 | 0.56991 | 1.00 | 0.47920 | 1.00 | 0.63098 | 1.00000 |
| At3g28270 | expressed protein                                                          | 1.50 | 0.04801 | 1.06 | 0.23405 | 0.34242 | 2.62 | 0.08932 | 1.28 | 0.09970 | 0.54744 |
| At1g11840 | lactoylglutathione lyase, putative / glyoxalase I, putative                | 1.50 | 0.00257 | 1.77 | 0.00085 | 0.20945 | 1.29 | 0.00654 | 1.27 | 0.06864 | 0.79711 |
| At3g57450 | expressed protein                                                          | 1.50 | 0.01524 | 1.29 | 0.09431 | 0.50378 | 1.25 | 0.13256 | 1.30 | 0.13959 | 0.79950 |
| At3g28450 | leucine-rich repeat transmembrane protein kinase, putative                 | 2.67 | 0.67319 | 3.16 | 0.76057 | 0.47595 | 1.64 | 0.03180 | 1.34 | 0.03170 | 0.52212 |
| At3g49070 | expressed protein                                                          | 1.49 | 0.01901 | 2.88 | 0.00361 | 0.03768 | 1.52 | 0.00184 | 1.44 | 0.03519 | 0.56841 |
| At1g52000 | jacalin lectin family protein                                              | 1.45 | 0.01544 | 2.02 | 0.00099 | 0.15505 | 1.50 | 0.01033 | 1.62 | 0.00723 | 0.63297 |
| At4g37540 | LOB domain protein 39 / lateral organ boundaries domain protein 39 (LBD39) | 1.43 | 0.01891 | 1.11 | 0.24747 | 0.31244 | 1.59 | 0.02120 | 1.52 | 0.01321 | 0.97925 |
| At3g44380 | expressed protein                                                          | 1.43 | 0.00598 | 1.87 | 0.17057 | 0.26142 | 1.52 | 0.00640 | 1.46 | 0.02734 | 0.79880 |
| At1g01470 | late embryogenesis abundant protein, putative / LEA protein, putative      | 1.42 | 0.03438 | 1.48 | 0.01940 | 0.68959 | 1.68 | 0.01609 | 1.10 | 0.22673 | 0.22547 |
| At1g69410 | eukaryotic translation initiation factor 5A, putative / eIF-5A, putative   | 1.42 | 0.00045 | 2.04 | 0.00030 | 0.00058 | 1.52 | 0.00398 | 1.60 | 0.00209 | 0.60258 |
| At2g38180 | GDSL-motif lipase/hydrolase family protein                                 | 1.35 | 0.09682 | 1.46 | 0.00919 | 0.59411 | 1.51 | 0.00584 | 1.67 | 0.00803 | 0.54872 |
| At5g52390 | photoassimilate-responsive protein, putative                               | 1.34 | 0.21634 | 1.21 | 0.66138 | 0.64877 | 5.37 | 0.02614 | 1.28 | 0.28273 | 0.18134 |
| At1g52000 | jacalin lectin family protein                                              | 1.32 | 0.08380 | 1.63 | 0.02223 | 0.46098 | 1.53 | 0.02374 | 1.56 | 0.02141 | 0.77679 |
| At1g73480 | hydrolase, alpha/beta fold family protein                                  | 1.30 | 0.04968 | 1.12 | 0.09499 | 0.63130 | 1.56 | 0.00918 | 2.07 | 0.00049 | 0.20292 |
| At3g19030 | expressed protein                                                          | 1.30 | 0.02207 | 1.11 | 0.17331 | 0.39739 | 1.67 | 0.01682 | 1.53 | 0.02422 | 0.99741 |
| At2g05440 | glycine-rich protein                                                       | 1.28 | 0.28043 | 1.15 | 0.31227 | 0.84550 | 1.94 | 0.01790 | 3.09 | 0.00074 | 0.11901 |
| At2g43100 | aconitase C-terminal domain-containing protein                             | 1.27 | 0.47127 | 1.67 | 0.13321 | 0.41449 | 1.59 | 0.01252 | 1.55 | 0.08836 | 0.83878 |
| At1g19180 | expressed protein                                                          | 1.26 | 0.00972 | 1.57 | 0.02044 | 0.12673 | 1.50 | 0.00779 | 1.79 | 0.01321 | 0.40840 |
| At2g36120 | pseudogene, glycine-rich protein                                           | 1.26 | 0.03622 | 1.35 | 0.26932 | 0.96999 | 1.83 | 0.00760 | 2.78 | 0.00011 | 0.08188 |
| At1g03820 | expressed protein                                                          | 1.13 | 0.31975 | 0.87 | 0.68262 | 0.21792 | 2.39 | 0.00048 | 1.44 | 0.08293 | 0.06898 |
| At1g28400 | expressed protein                                                          | 1.12 | 0.08619 | 0.81 | 0.63839 | 0.00733 | 2.35 | 0.00040 | 1.33 | 0.05618 | 0.03242 |
| At5g09530 | hydroxyproline-rich glycoprotein family protein                            | 1.09 | 0.85627 | 1.03 | 0.96191 | 0.90947 | 5.69 | 0.00000 | 1.46 | 0.13264 | 0.00085 |
| At1g02820 | late embryogenesis abundant 3 family protein / LEA3 family protein         | 1.01 | 0.10446 | 1.01 | 0.88780 | 0.55817 | 1.99 | 0.01301 | 1.19 | 0.02963 | 0.26927 |
| At4g09030 | arabinogalactan-protein (AGP10)                                            | 1.00 | 0.04724 | 1.32 | 0.01716 | 0.02300 | 1.90 | 0.00005 | 1.35 | 0.02068 | 0.04875 |
| At3g28300 | integrin-related protein 14a                                               | 0.78 | 0.71576 | 0.50 | 0.06510 | 0.07218 | 1.97 | 0.04242 | 1.44 | 0.00538 | 0.91247 |

**Table S2.** Genes suppressed by *Spodoptera littoralis* oral secretions (OS).

Expression changes in response to wounding or OS treatment were compared to data from a similar experiment comparing insect feeding with wounding. *P*-values refer to the comparison between wounding and OS treatment or between wounding and insect treatment (Student's *t*-test).

<sup>a</sup>Data from this study. Expression ratios ( $\pm$ SE) are the average of six (wounding) and three (OS) independent experiments.

<sup>b</sup>Data from Reymond et al. 2004 (Plant Cell 16:3132-3147). Expression ratios ( $\pm$ SE) are the average of four (wounding) and five (insect feeding) independent experiments. All treatments were done for 3-5 h. NA, gene not present on the microarray.

| AGI code       | Description                      | Expression ratio <sup>a</sup> |                         |                 | Expression ratio <sup>b</sup> |                      |                 |                 |                 |
|----------------|----------------------------------|-------------------------------|-------------------------|-----------------|-------------------------------|----------------------|-----------------|-----------------|-----------------|
|                |                                  | Wounding                      | <i>S. littoralis</i> OS | <i>P</i> -value | Wounding                      | <i>S. littoralis</i> | <i>P</i> -value | <i>P. rapae</i> | <i>P</i> -value |
| Treatment 6 h  |                                  |                               |                         |                 |                               |                      |                 |                 |                 |
| At5g61890      | ERF/AP2 transcription factor     | 3.32 $\pm$ 0.59               | 1.41 $\pm$ 0.28         | <0.001          | NA                            | NA                   | NA              | NA              | NA              |
| At3g20470      | glycine-rich protein (GRP-5)     | 2.15 $\pm$ 0.15               | 1.22 $\pm$ 0.12         | <0.001          | NA                            | NA                   | NA              | NA              | NA              |
| At4g18280      | glycine-rich protein             | 2.04 $\pm$ 0.15               | 1.22 $\pm$ 0.04         | <0.001          | NA                            | NA                   | NA              | NA              | NA              |
| At1g73330      | protease inhibitor (DR4)         | 1.96 $\pm$ 0.26               | 1.11 $\pm$ 0.11         | <0.001          | 1.07 $\pm$ 0.12               | 0.99 $\pm$ 0.02      | 0.54            | 1.05 $\pm$ 0.03 | 0.97            |
| At1g05300      | metal transporter (ZIP5)         | 1.89 $\pm$ 0.30               | 0.96 $\pm$ 0.10         | <0.01           | NA                            | NA                   | NA              | NA              | NA              |
| At4g24510      | eceriferum protein (CER2)        | 1.62 $\pm$ 0.09               | 1.07 $\pm$ 0.05         | <0.001          | 2.57 $\pm$ 0.34               | 1.04 $\pm$ 0.13      | <0.01           | 1.37 $\pm$ 0.09 | <0.01           |
| At1g75900      | extracellular lipase 3 (EXL3)    | 1.57 $\pm$ 0.30               | 0.83 $\pm$ 0.12         | <0.05           | 1.61 $\pm$ 0.17               | 0.95 $\pm$ 0.03      | <0.01           | 1.00 $\pm$ 0.03 | <0.01           |
| At1g51090      | heavy-metal-associated protein   | 1.55 $\pm$ 0.14               | 1.01 $\pm$ 0.15         | <0.01           | NA                            | NA                   | NA              | NA              | NA              |
| Treatment 24 h |                                  |                               |                         |                 |                               |                      |                 |                 |                 |
| At3g22620      | protease inhibitor               | 5.34 $\pm$ 0.62               | 1.60 $\pm$ 0.28         | <0.001          | 1.27 $\pm$ 0.10               | 0.89 $\pm$ 0.08      | <0.05           | 0.84 $\pm$ 0.03 | <0.01           |
| At5g09530      | hydroxyproline-rich glycoprotein | 5.69 $\pm$ 0.71               | 1.46 $\pm$ 0.32         | <0.001          | 1.39 $\pm$ 0.03               | 1.05 $\pm$ 0.10      | <0.05           | 1.05 $\pm$ 0.04 | <0.01           |
| At5g05340      | peroxidase                       | 2.96 $\pm$ 0.35               | 1.56 $\pm$ 0.18         | <0.001          | NA                            | NA                   | NA              | NA              | NA              |
| At1g28400      | unknown protein                  | 2.35 $\pm$ 0.38               | 1.33 $\pm$ 0.06         | <0.001          | 1.19 $\pm$ 0.06               | 0.94 $\pm$ 0.06      | <0.05           | 0.82 $\pm$ 0.07 | <0.01           |
| At4g09030      | arabinogalactan-protein (AGP10)  | 1.90 $\pm$ 0.14               | 1.35 $\pm$ 0.20         | <0.001          | NA                            | NA                   | NA              | NA              | NA              |
